# Supplementary material for: Pyrrolo[3,4-g]quinoxaline-6,8-dione-based conjugated copolymers for bulk heterojunction solar cells with high photovoltages
Source: Royal Society of Chemistry journal article supplement (doi:10.1039/c5py00394f), 2015-01-01

## Electronic Supplementary Information

### Pyrrolo[3,4-g]quinoxaline-6,8-dione-based Conjugated Copolymers for Bulk Heterojunction Solar Cells with High Photovoltages

Xiaofeng Xu,<sup>†a</sup> Chuanfei Wang,<sup>†b</sup> Olof Bäcké,<sup>c</sup> David I. James,<sup>a</sup> Kim Bini,<sup>a</sup> Eva Olsson,<sup>c</sup> Mats R. Andersson,<sup>ad</sup> Mats Fahlman,<sup>b</sup> Ergang Wang<sup>\*a</sup>

<sup>a</sup>*Department of Chemistry and Chemical Engineering, Chalmers University of Technology, SE-412 96 Göteborg, Sweden, E-mail: ergang@chalmers.se*

<sup>b</sup>*Division of Surface Physics and Chemistry, IFM, Linköping University, SE-581 83 Linköping, Sweden*

<sup>c</sup>*Department of Applied Physics, Chalmers University of Technology, SE-412 96 Göteborg, Sweden*

<sup>d</sup>*Ian Wark Research Institute, University of South Australia, Mawson Lakes, South Australia 5095, Australia*

## Size Exclusion Chromatography (SEC) Measurement

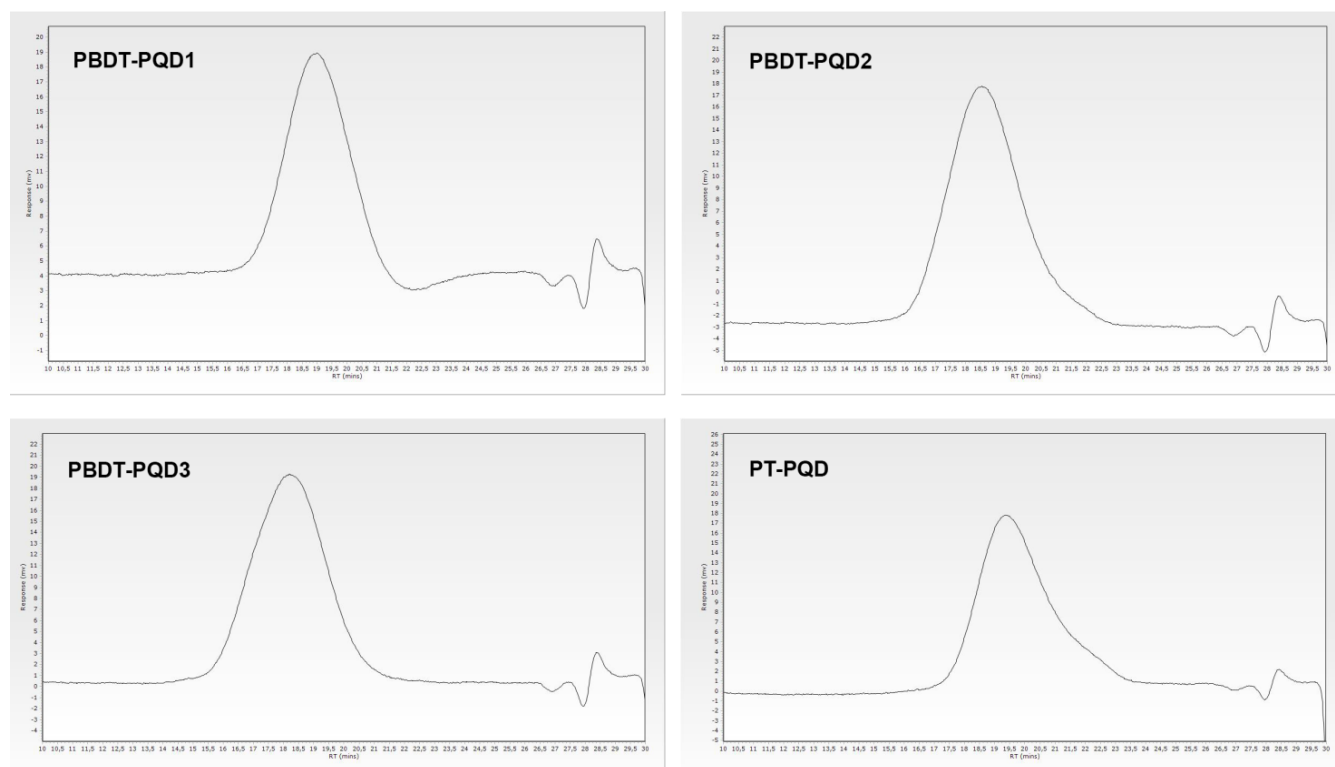

**Fig. S1** SEC chromatographs of the four copolymers.

## Cyclic Voltammetry (CV) Measurement

As shown in Fig. S2, the electrochemical properties of the four copolymers were characterized using cyclic voltammetry (CV) measurement. The CV measurement was carried out on a CH-Instruments 650A Electrochemical Workstation with platinum electrodes at a scan rate of  $50 \text{ mV s}^{-1}$  against an  $\text{Ag}/\text{Ag}^+$  reference electrode with nitrogen-saturated solution of  $0.1 \text{ M}$  tetrabutylammonium hexafluorophosphate ( $\text{Bu}_4\text{NPF}_6$ ) in anhydrous acetonitrile ( $\text{CH}_3\text{CN}$ ). All potentials were calibrated with the standard ferrocene/ferrocenium redox couple. The HOMO levels were derived from the onset of oxidation ( $E_{\text{ox}}$ ) of the CV curves, which were calculated according to the equations:  $\text{HOMO} = -(E_{\text{ox}} + 5.13) \text{ eV}$ . The reduction process of the four copolymers cannot be detected in the CV measurements.

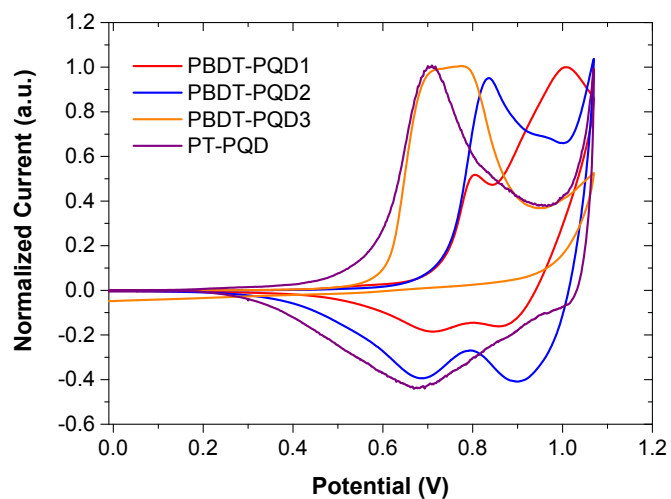

**Fig. S2** Cyclic voltammetry (CV) plots of the four copolymers.

**Table S1** Electrochemical properties of the copolymers from CV measurements.

| Polymer   | HOMO<br>(eV) |
|-----------|--------------|
| PBDT-PQD1 | −5.78        |
| PBDT-PQD2 | −5.78        |
| PBDT-PQD3 | −5.68        |
| PT-PQD    | −5.61        |

# <sup>1</sup>H and <sup>13</sup>C NMR Spectra of the Compounds

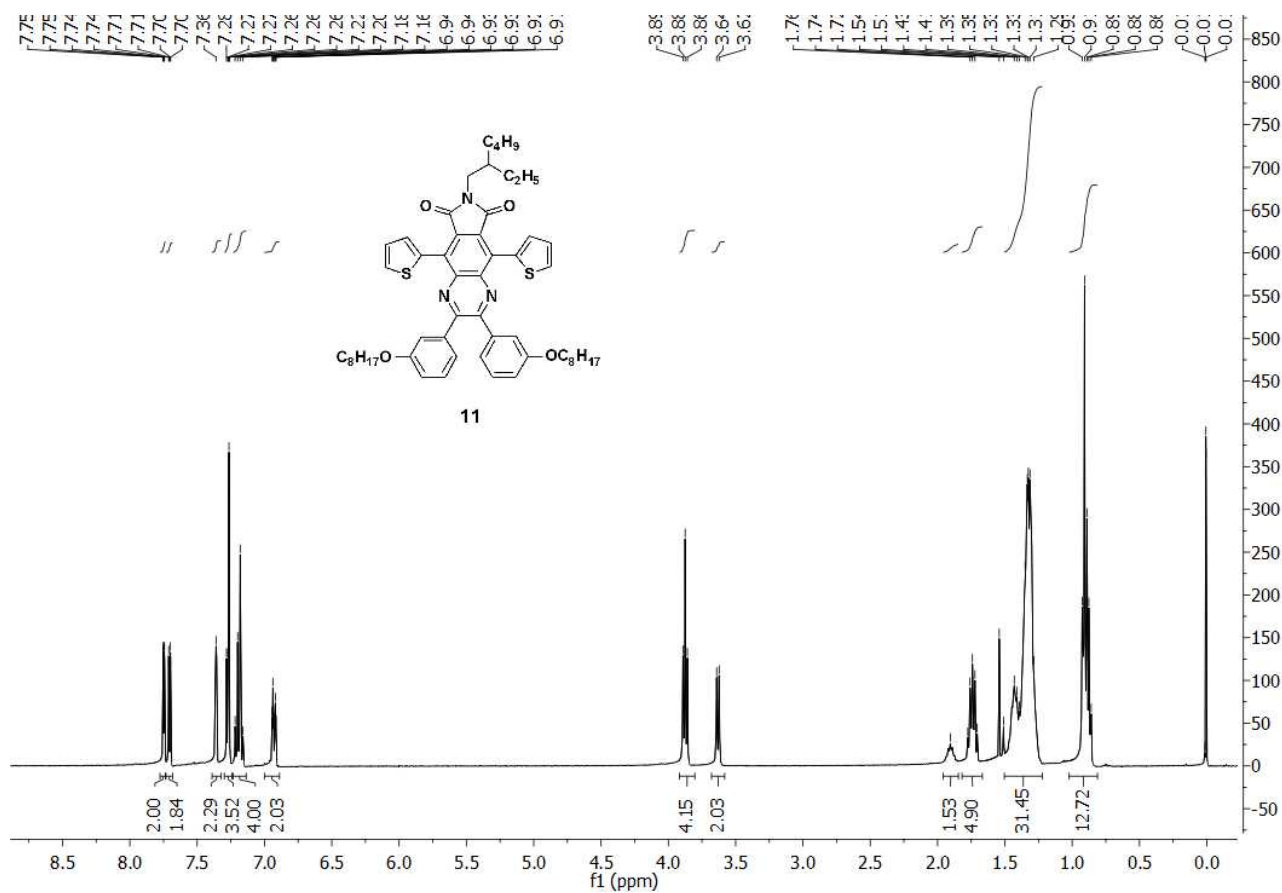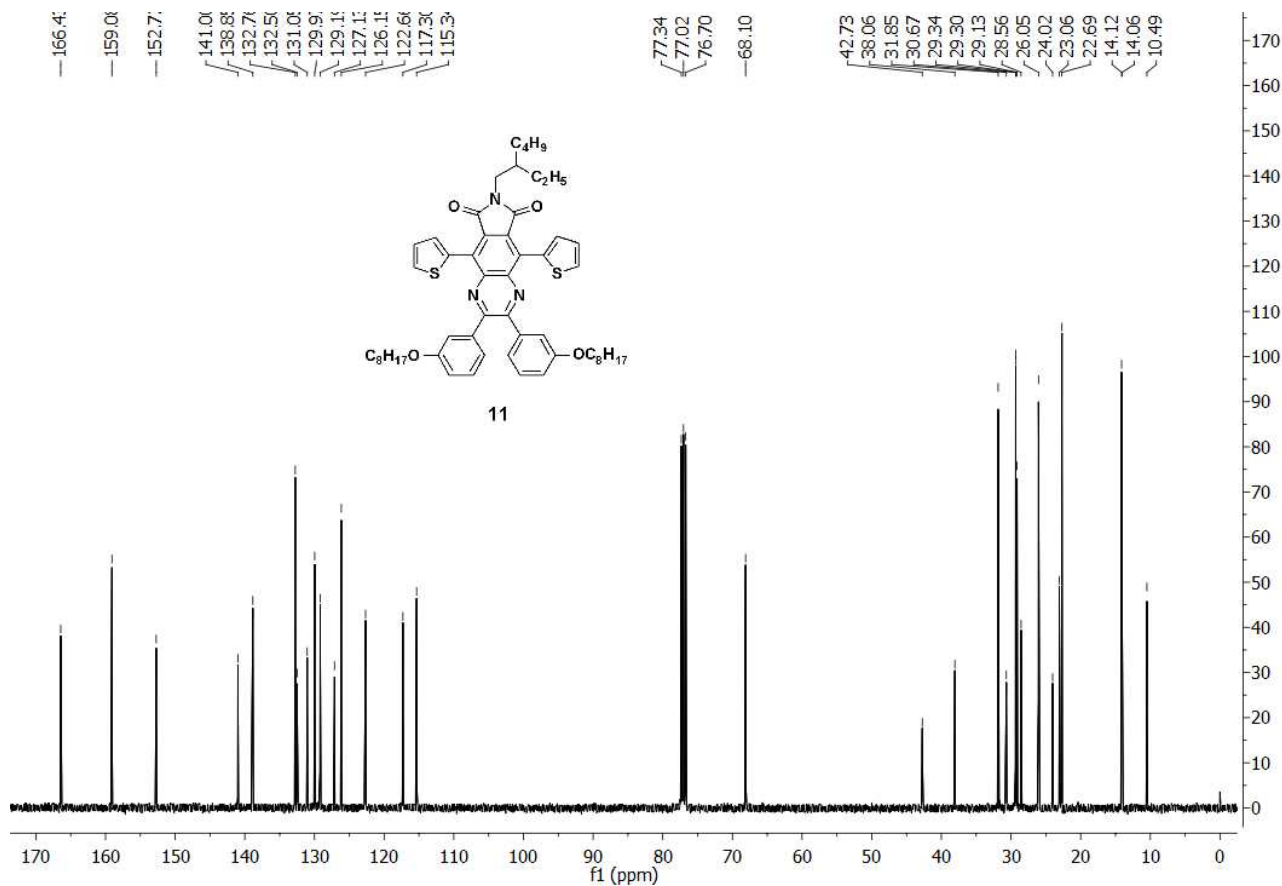

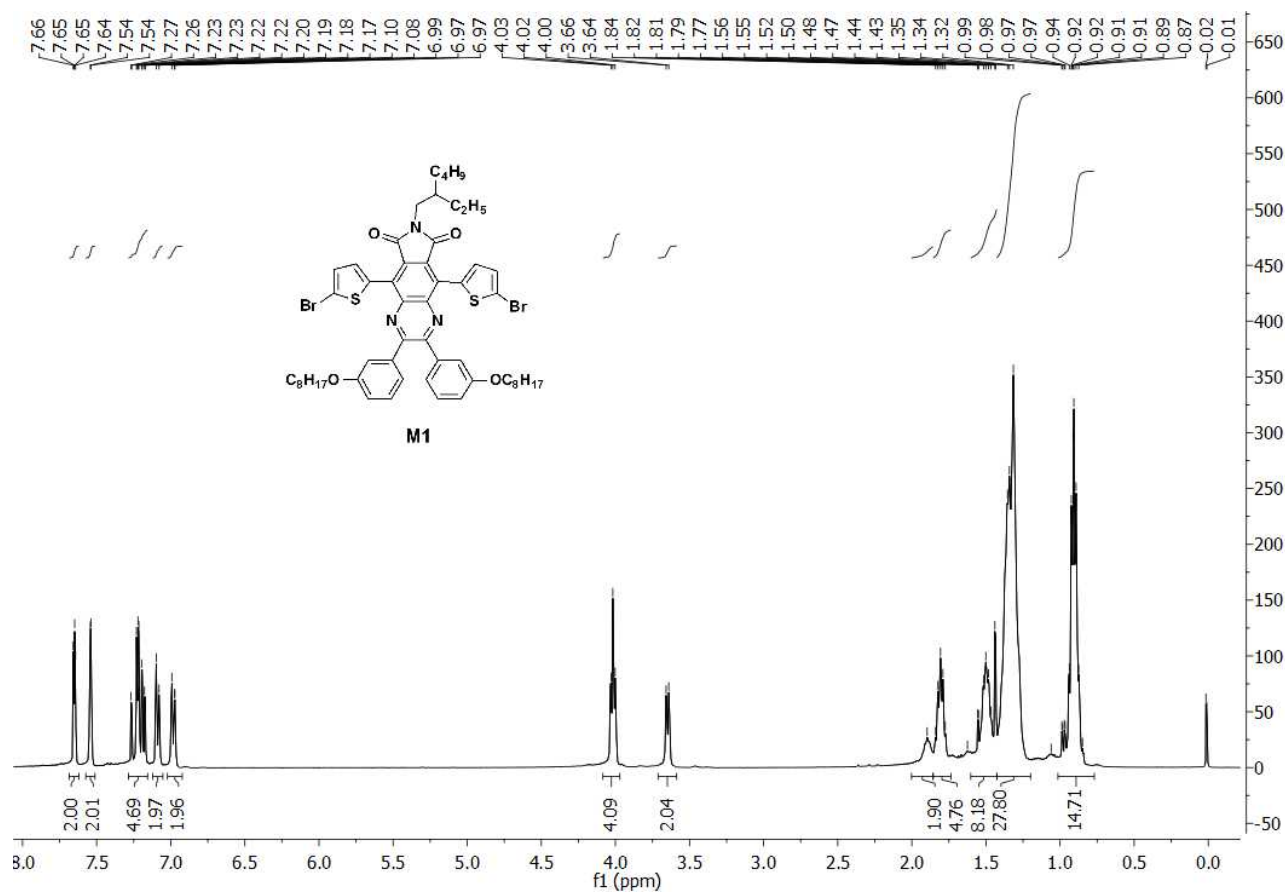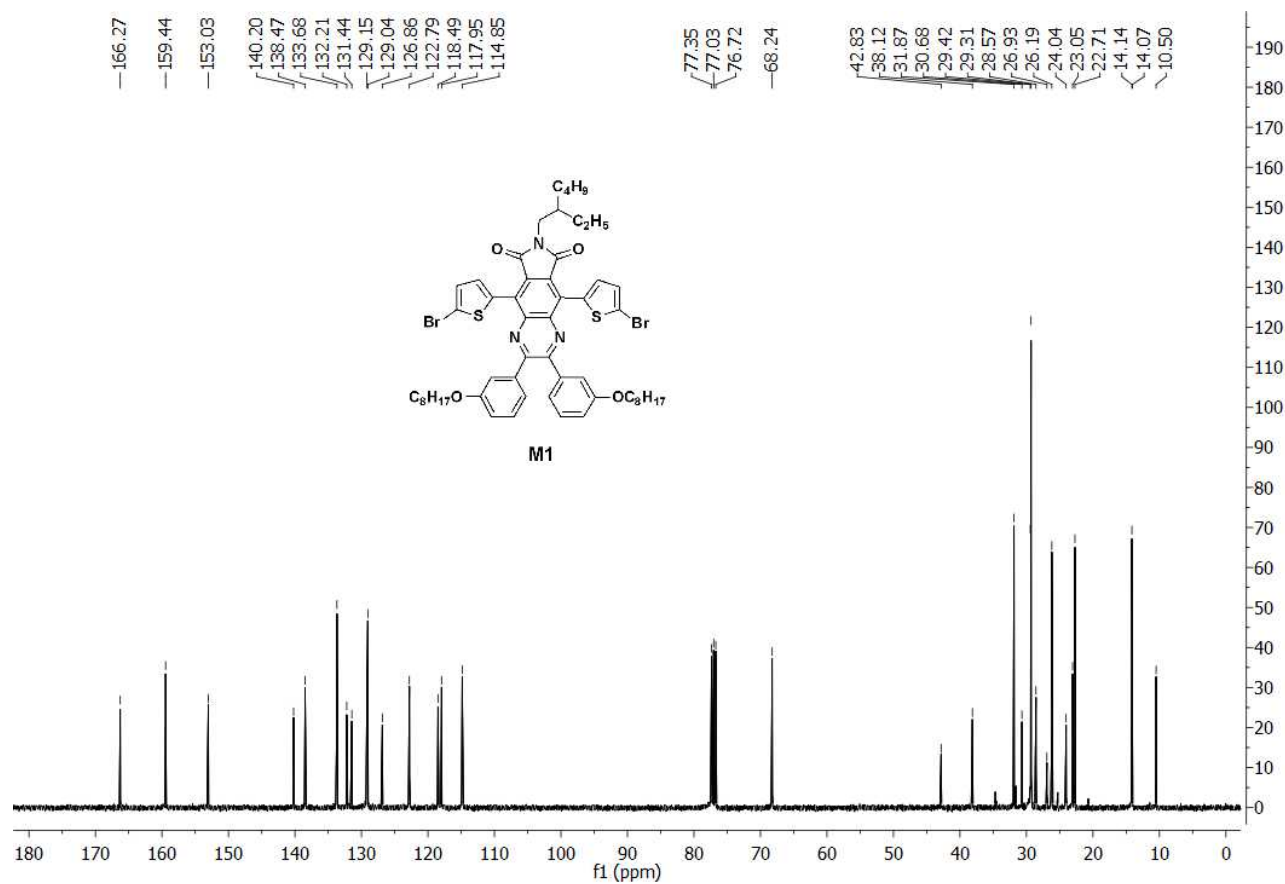

Supplement: c5py00394f1.pdf [file c5py00394f1.pdf]
